# Supplementary material for: MiR-146a upregulates FOXP3 and suppresses inflammation by targeting HIPK3/STAT3 in allergic conjunctivitis
Source: PubMed Central journal article supplement — Ann Transl Med. 2022 Mar;10(6):344. doi: 10.21037/atm-22-982 (PMC9011242; doi:10.21037/atm-22-982), 2022-03
Supplement: atm-10-06-344-dss.pdf [file atm-10-06-344-dss.pdf]

## Data Sharing Statement

|                     |                                                                                                                                                     |                                                                                                                                  |
|---------------------|-----------------------------------------------------------------------------------------------------------------------------------------------------|----------------------------------------------------------------------------------------------------------------------------------|
| <b>Article Info</b> | <a href="https://dx.doi.org/10.21037/atm-22-1059">https://dx.doi.org/10.21037/atm-22-1059</a>                                                       |                                                                                                                                  |
| <b>Item</b>         | <b>Question</b>                                                                                                                                     | <b>Authors' Response<br/>(place "-" if not applicable)</b>                                                                       |
| 1                   | Would you like to share data collected for your study to others?                                                                                    | Yes.                                                                                                                             |
| 2                   | If not, would you like to share the reason for your decision?                                                                                       |                                                                                                                                  |
| 3                   | What data in particular will be shared?                                                                                                             | The correlation between the <i>C butyricum</i> with regeneration of intestinal LVs has seldom been provided in previous studies. |
| 4                   | Any other documents will be shared? Such as study protocol, statistical analysis plan, informed consent form, clinical study report, analytic code. | Study protocol, statistical analysis plan will also be shared if requested.                                                      |
| 5                   | When will data availability begin?                                                                                                                  | From the publication date.                                                                                                       |
| 6                   | When will data availability end?                                                                                                                    | Data from articles will be shared for a long period.                                                                             |
| 7                   | To whom will you share the data?                                                                                                                    | Medical researchers who are interested in studies of IBD.                                                                        |
| 8                   | For what type of analysis or purpose?                                                                                                               | For analysis to evaluate the safety of Clostridium butyricum in IBD treatment.                                                   |
| 9                   | How or where can the data/documents be obtained?                                                                                                    | Emails could be sent to the address below to obtain the shared data: m510425@126.com.                                            |
| 10                  | Any other restrictions?                                                                                                                             | No.                                                                                                                              |
